# Supplementary material for: Timing of Maternal COVID-19 Vaccine and Antibody Concentrations in Infants Born Preterm
Source: PubMed Central journal article supplement (PMC10799259; doi:10.1001/jamanetworkopen.2023.52387), 2024-01-19

## Supplementary Online Content

Kachikis A, Pike M, Eckert LO, et al. Timing of parental COVID-19 vaccine and antibody concentrations in infants born preterm. *JAMA Netw Open*. 2024;7(1): e2352387. doi:10.1001/jamanetworkopen.2023.52387

**eTable 1.** Maternal and Cord Anti-Spike (S) Antibody Levels by Early Preterm, Late Preterm, and Term

**eTable 2.** Linear Regression Analyses of the Association Between Preterm Birth and Maternal and Cord Anti-Spike (S) Antibody Levels, Adjusted for Gestational Age at Last Dose, Time Between Last Dose and Delivery, and Number of Doses Prior to Delivery

**eTable 3.** Maternal and Cord Anti-Spike (S) Antibody Levels by Number of Doses During Pregnancy

**eFigure.** Scatterplot and Lowess Smoothing Line for the Relationship Between Time Between Last Dose and Delivery and Cord:Maternal Anti-Spike (S) Antibody Ratios by Preterm Status, Stratified by Number of Doses

This supplementary material has been provided by the authors to give readers additional information about their work.

**eTable 1.** Maternal and Cord Anti-Spike (S) Antibody Levels by Early Preterm, Late Preterm, and Term

|                 | Total            | Early Preterm<br><34 weeks GA | Late Preterm<br>≥34 - <37 weeks GA | Term<br>≥37 weeks GA | P-value |
|-----------------|------------------|-------------------------------|------------------------------------|----------------------|---------|
| <b>Overall</b>  | <b>n=220</b>     | <b>n=7</b>                    | <b>n=29</b>                        | <b>n=184</b>         |         |
| Maternal anti-S | 2070 (1682-2547) | 2635 (958-7250)               | 4837 (2860-8183)                   | 1794 (1429-2252)     | 0.005   |
| Cord anti-S     | 2817 (2338-3395) | 2557 (999-6542)               | 6011 (3671-9842)                   | 2509 (2046-3076)     | 0.01    |
| Ratio           | 1.36 (1.28-1.44) | 0.97 (0.57-1.66)              | 1.24 (1.06-1.45)                   | 1.40 (1.31-1.49)     | 0.34    |

Notes: Geometric mean concentrations (95% confidence intervals); maternal and cord anti-spike antibody levels compared using Kruskal Wallis rank test for non-normal continuous variables; ratio is calculated from untransformed values as cord anti-spike antibody concentration divided by maternal anti-spike antibody concentration and compared using one-way ANOVA for normally distributed continuous variables

Abbreviations: anti-S = anti-Spike antibody; GA = gestational age

**eTable 2.** Linear Regression Analyses of the Association Between Preterm Birth and Maternal and Cord Anti-Spike (S) Antibody Levels, Adjusted for Gestational Age at Last Dose, Time Between Last Dose and Delivery, and Number of Doses Prior to Delivery

|                                    | $\beta$ -coefficient<br>(95% CI) | P-value | *Adjusted $\beta$ -<br>coefficient (95% CI) | P-value | +Adjusted $\beta$ -<br>coefficient (95% CI) | P-value |
|------------------------------------|----------------------------------|---------|---------------------------------------------|---------|---------------------------------------------|---------|
| <b>Maternal Anti-S</b>             |                                  |         |                                             |         |                                             |         |
| Term                               | 0.0 (ref)                        | -       | 0.0 (ref)                                   | -       | 0.0 (ref)                                   | -       |
| Preterm                            | 1.26 (0.47-2.05)                 | 0.002   | 0.47 (-0.17-1.12)                           | 0.150   | 0.44 (-0.21-1.10)                           | 0.182   |
| <b>Cord Anti-S</b>                 |                                  |         |                                             |         |                                             |         |
| Term                               | 0.0 (ref)                        | -       | 0.0 (ref)                                   | -       | 0.0 (ref)                                   | -       |
| Preterm                            | 1.02 (0.30-1.74)                 | 0.005   | 0.28 (-0.31-0.87)                           | 0.343   | 0.26 (-0.34-0.86)                           | 0.397   |
| <b>Ratio: cord/maternal anti-S</b> |                                  |         |                                             |         |                                             |         |
| Term                               | 0.0 (ref)                        | -       | 0.0 (ref)                                   | -       | 0.0 (ref)                                   | -       |
| Preterm                            | -0.22 (-0.42 to -0.03)           | 0.025   | -0.17 (-0.40-0.06)                          | 0.139   | -0.17 (-0.40-0.06)                          | 0.153   |

\*Adjusted for GA at last dose, time between last dose and delivery (weeks), and number of doses prior to delivery

+Adjusted for GA at last dose, time between last dose and delivery (weeks), number of doses prior to delivery, insurance (private/other), and immunocompromising drugs (yes/no)

Abbreviations: CI = confidence interval; GA = gestational age; anti-S = anti-Spike antibody

**eTable 3.** Maternal and Cord Anti-Spike (S) Antibody Levels by Number of Doses During Pregnancy

|                  | Total             | Preterm          | Term               | P-value |
|------------------|-------------------|------------------|--------------------|---------|
| <b>Overall</b>   | n=220             | n=36             | n=184              |         |
| Maternal anti-S  | 2070 (1682-2547)  | 4299 (2733-6762) | 1794 (1429-2252)   | 0.002   |
| Cord anti-S      | 2817 (2338-3395)  | 5090 (3300-7850) | 2509 (2046-3076)   | 0.007   |
| Ratio            | 1.36 (1.28-1.44)  | 1.18 (1.02-1.38) | 1.40 (1.31-1.49)   | 0.025   |
| <b>0-1 Doses</b> | n=75              | n=27             | n=48               |         |
| Maternal anti-S  | 5548 (4162-7396)  | 4661 (2832-7669) | 6120 (4262-8788)   | 0.26    |
| Cord anti-S      | 7232 (5473-9554)  | 5731 (3497-9392) | 8242 (5848-11616)  | 0.14    |
| Ratio            | 1.30 (1.18-1.43)  | 1.23 (1.03-1.47) | 1.35 (1.20-1.51)   | 0.41    |
| <b>2 Doses</b>   | n=121             | n=7              | n=114              |         |
| Maternal anti-S  | 826 (674-1013)    | 3237 (803-13051) | 760 (624-925)      | 0.011   |
| Cord anti-S      | 1248 (1038-1501)  | 3315 (997-11026) | 1176 (980-1410)    | 0.031   |
| Ratio            | 1.51 (1.42-1.61)  | 1.02 (0.66-1.59) | 1.55 (1.46-1.64)   | 0.011   |
| <b>3+ Doses</b>  | n=24              | n=2              | n=22               |         |
| Maternal anti-S  | 9730 (5959-15887) | 3894*            | 10574 (6713-16657) | 0.71    |
| Cord anti-S      | 8953 (6127-13081) | 4603*            | 9511 (6750-13399)  | 0.68    |
| Ratio            | 0.92 (0.69-1.23)  | 1.18*            | 0.90 (0.66-1.23)   | 0.76    |

Notes: geometric mean concentration (95% confidence interval); maternal and cord anti-S antibody compared using Wilcoxon rank sum test; ratio is calculated as cord anti-spike antibody level divided by maternal anti-spike antibody level and compared using t-test for normally distributed continuous variables.

\*95% CIs not computed for participants with preterm birth and 3+ doses during pregnancy due to small numbers.

Abbreviations: anti-S = anti-Spike antibody

**eFigure.** Scatterplot and Lowess Smoothing Line for the Relationship Between Time Between Last Dose and Delivery and Cord:Maternal Anti-Spike (S) Antibody Ratios by Preterm Status, Stratified by Number of Doses

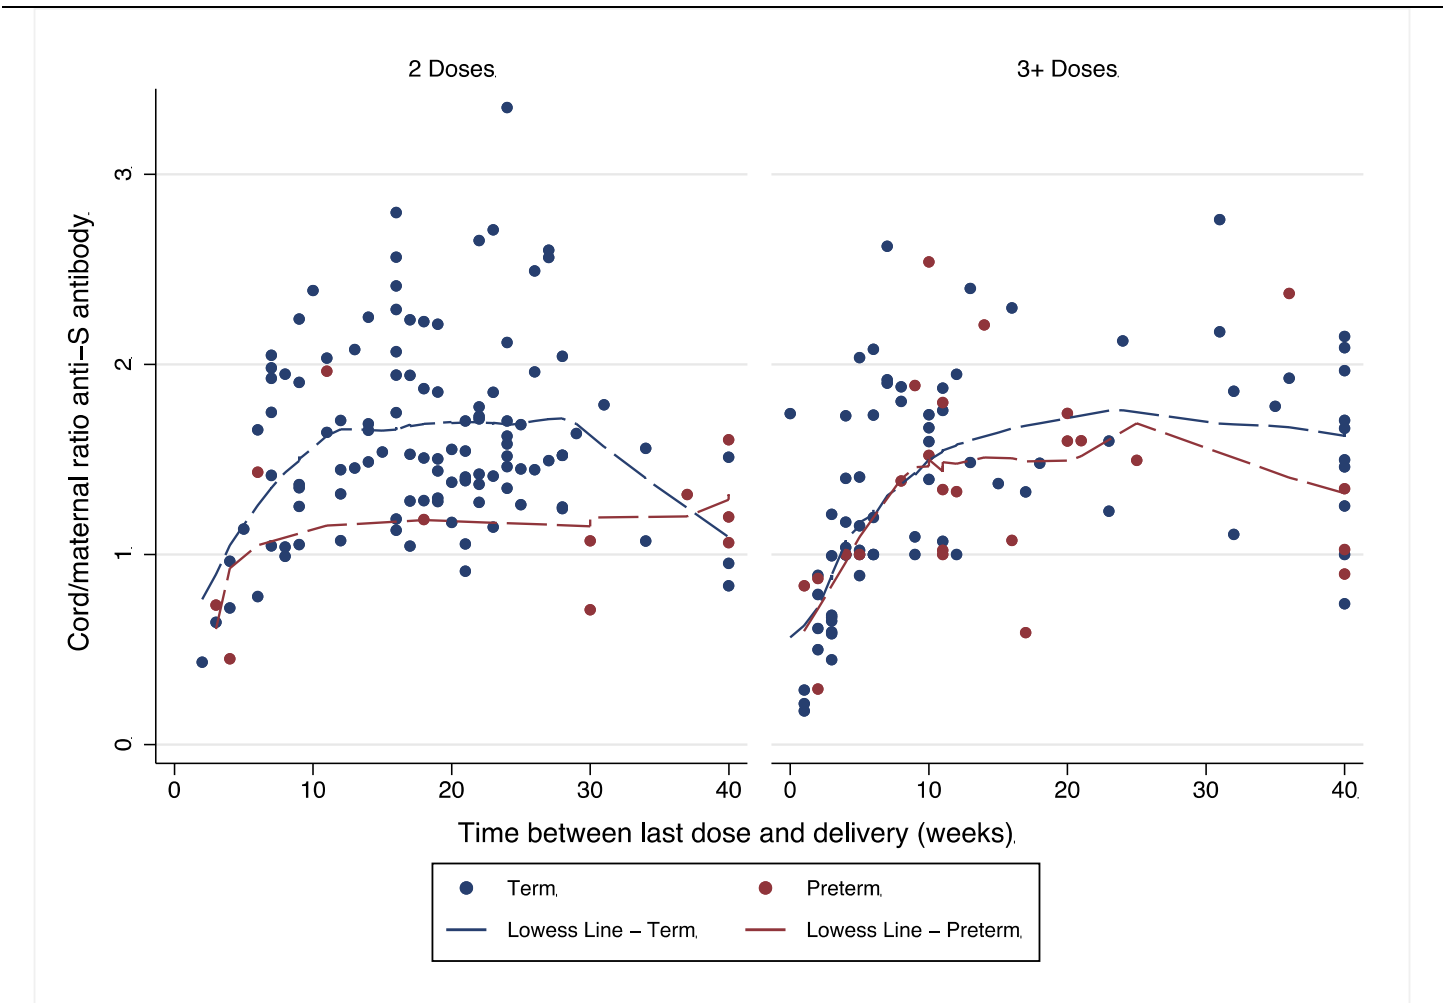

Supplement: jamanetwopen-e2352387-s001.pdf [file jamanetwopen-e2352387-s001.pdf]
