# Supplementary material for: Timing of Maternal COVID-19 Vaccine and Antibody Concentrations in Infants Born Preterm
Source: PubMed Central journal article supplement (PMC10799259; doi:10.1001/jamanetworkopen.2023.52387), 2024-01-19
Supplement: jamanetwopen-e2352387-s002.pdf [file jamanetwopen-e2352387-s002.pdf]

## Data Sharing Statement

Kachikis. Timing of Maternal COVID-19 Vaccine and Antibody Concentrations in Infants Born Preterm. *JAMA Netw Open*. Published January 19, 2024.

doi:10.1001/jamanetworkopen.2023.52387

### Data

**Data available:** No

### Additional Information

**Explanation for why data not available:** The data associated with this cohort is still under analysis and is therefore not currently available.
